# Supplementary material
Source: PubMed Central journal article supplement (PMC6923577)
Supplement: NIHMS1541580-supplement-1.pdf [file NIHMS1541580-supplement-1.pdf]

**Supplementary Table 1. Fully-adjusted hazard ratios (95% CI) for systemic lupus erythematosus (SLE) by prudent and Western dietary pattern quartiles**

|                                        | Prudent pattern quartiles |                  |                  |                    |            | Western pattern quartiles |                  |                  |                     |            |
|----------------------------------------|---------------------------|------------------|------------------|--------------------|------------|---------------------------|------------------|------------------|---------------------|------------|
|                                        | Q1<br>Least healthy       | Q2               | Q3               | Q4<br>Most healthy | P<br>trend | Q1<br>Most healthy        | Q2               | Q3               | Q4<br>Least healthy | P<br>trend |
| <b>Nurses' Health Study (NHS)</b>      |                           |                  |                  |                    |            |                           |                  |                  |                     |            |
| Cases/person-years                     | 18/464,970                | 22/500,232       | 24/502,584       | 18/473,470         |            | 17/452,968                | 14/497,549       | 26/506,705       | 25/484,034          |            |
| Fully-adjusted model*                  | 1.00 (ref)                | 1.11 (0.59,2.11) | 1.17 (0.61,2.26) | 0.89 (0.42,1.90)   | 0.74       | 1.00 (ref)                | 0.88 (0.43,1.81) | 1.21 (0.59,2.47) | 1.32 (0.57,3.08)    | 0.33       |
| <b>Nurses' Health Study II (NHSII)</b> |                           |                  |                  |                    |            |                           |                  |                  |                     |            |
| Cases/person-years                     | 24/448,243                | 29/481,584       | 28/486,180       | 17/475,791         |            | 19/460,436                | 29/483,659       | 23/484,510       | 27/463,194          |            |
| Fully-adjusted model*                  | 1.00 (ref)                | 1.26 (0.72,2.21) | 1.21 (0.68,2.17) | 0.77 (0.38,1.57)   | 0.41       | 1.00 (ref)                | 1.37 (0.75,2.49) | 1.12 (0.57,2.20) | 1.34 (0.61,2.95)    | 0.60       |
| <b>Meta-analysis (NHS+NHSII)</b>       |                           |                  |                  |                    |            |                           |                  |                  |                     |            |
| Cases/person-years                     | 42/913,213                | 51/981,816       | 52/988,764       | 35/949,261         |            | 36/913,404                | 43/981,208       | 49/991,215       | 52/947,228          |            |
| Fully-adjusted model*                  | 1.00 (ref)                | 1.20 (0.79,1.82) | 1.20 (0.77,1.85) | 0.82 (0.49,1.38)   | 0.39       | 1.00 (ref)                | 1.14 (0.72,1.81) | 1.16 (0.71,1.89) | 1.33 (0.75,2.37)    | 0.32       |

\* Adjusted for age, total average energy intake, race (Caucasian vs. non-Caucasian), smoking (never, past, current), BMI, physical activity (METS/week), U.S. Census tract median household income <\$60,000 vs ≥ \$60,000, oral contraceptive use (never vs. ever), menopausal status (pre-menopausal, post-menopausal and never used post-menopausal hormones, post-menopausal and ever used post-menopausal hormones). Meta-analysis further adjusted for cohort.
